# Supplementary material
Source: ML conference proceedings conference paper supplement (https://openreview.net/forum?id=86iCmraCBL)
Supplement: supplementary_material [file attachment]

## A Deterministic lower bound

While there remains a small gap between our main lower bound of Theorem 3 and the deterministic quantised gradient descent of Section 6, we can show that the gap cannot be closed by improved deterministic algorithms where the coordinator learns value of objective function  $F(x)$  in addition to the minimiser  $x$ . That is, our quantised gradient descent is the communication-optimal deterministic algorithm for variant (1) for objectives with constant condition number.

Recall that in the  $N$ -player equality over universe of size  $d$ , denoted by  $\text{EQ}_{d,N}$ , each player  $i$  is given an input  $b_i \in \{0, 1\}^d$ , and the task is to decide if all players have the same input. That is,  $\text{EQ}_{d,N}(b_1, \dots, b_N) = 1$  if all inputs are equal, and 0 otherwise. It is known [33] that the deterministic communication complexity of  $\text{EQ}_{d,N}$  is  $\text{CC}(\text{EQ}_{d,N}) = \Omega(Nd)$ .

**Theorem 8.** *Given parameters  $N, d, \varepsilon, \beta_0$  and  $\beta = \beta_0 N$  satisfying  $d\beta/\varepsilon = \Omega(1)$ , any deterministic protocol solving (1) for quadratic input functions  $x \mapsto \beta_0 \|x - x_0\|_2^2$  has communication complexity  $\Omega(Nd \log(\beta d/\varepsilon))$ , if the coordinator is also required to output estimate  $r \in \mathbb{R}$  for the minimum function value such that  $\sum_{i=1}^N f_i(z) \leq r \leq \sum_{i=1}^N f_i(z) + \varepsilon$ .*

*Proof.* Assume  $\Pi$  is a deterministic protocol solving (1) with communication complexity  $C_\Pi$ . We show that  $\Pi$  can then solve  $N$ -party equality over a universe of size  $D = \Omega(d \log(\beta d/\varepsilon))$ , implying

$$C_\Pi = \Omega(ND) = \Omega(Nd \log(\beta d/\varepsilon)).$$

More specifically, let  $S$  be the set given by Lemma 2 with  $\delta = (2\varepsilon/\beta)^{1/2}$ , and let  $D = \lceil \log |S| \rceil = \Theta(d \log(\beta d/\varepsilon))$ . Note that since we assume  $d\beta/\varepsilon = \Omega(1)$ , the set  $S$  has at least two elements and  $D \geq 1$ . For technical convenience, assume  $|S| = 2^D$ , and identify each binary string  $b \in \{0, 1\}^D$  with an element  $\tau(b) \in S$ .

Next, assume that each node  $i$  is given a binary string  $b_i \in \{0, 1\}^D$  as input, and we want to compute  $\text{EQ}_{D,N}(b_1, b_2, \dots, b_N)$ . The nodes simulate protocol  $\Pi$  with input function  $f_i$  for node  $i$ , where  $f_i(x) = \beta_0 \|x - \tau(b_i)\|_2^2$ . Let us denote  $F = \sum_{i=1}^d f_i$ . Upon termination of the protocol, the coordinator learns a point  $y \in [0, 1]^d$  satisfying  $F(y) \leq F(x^*) + \varepsilon$  and an estimate  $r \in \mathbb{R}$  satisfying  $r \leq F(y) + \varepsilon$ , where  $x^*$  is the true global minimum. The coordinator can now adjudicate equality based on  $F(y)$  as follows:

- (1) If all inputs  $b_i$  are equal, then the functions  $f_i$  are also equal, and  $F(x^*) = 0$ . In this case, we have  $F(y) \leq 2\varepsilon$ , and the coordinator outputs 1.
- (2) If there are nodes  $i$  and  $j$  such that  $i \neq j$ , then for all points  $x \in [0, 1]^d$ , we have  $f_i(x) + f_j(x) > 2\varepsilon$  by the definition of  $S$ , and thus  $F(x^*) > 2\varepsilon$ . In this case, we have  $r > 2\varepsilon$ , and the coordinator outputs 0.

Since communication is only used for the simulation of  $\Pi$ , this computes  $\text{EQ}_{D,N}(b_1, b_2, \dots, b_N)$  with  $C_\Pi$  total communication, completing the proof.  $\square$

## B Lower bound for non-convex functions

We now show a simple lower bound for optimisation over non-convex objective functions. We reduce from the  $N$ -player *set disjointness* over universe of size  $d$ , denoted by  $\text{DISJ}_{d,N}$ : each player  $i$  is given an input  $b_i \in \{0, 1\}^d$ , and the coordinator needs to output 0 if there is a coordinate  $\ell \in [d]$  such that  $b_i(\ell) = 1$  for all  $i \in [N]$ , and 1 otherwise.

**Theorem 11** ([6]). *For  $\delta > 0, N \geq 1$  and  $d = \omega(\log N)$ , the randomised communication complexity of set disjointness is  $\text{RCC}^\delta(\text{DISJ}_{d,N}) = \Omega(Nd)$ .*

Again consider for fixed  $\varepsilon, d$  and  $\beta$  the set  $S$  given by Lemma 2 with  $\delta = 2\varepsilon/\beta$ . This gives a set  $S$  with size at least  $(\beta d^{1/2}/2C\varepsilon)^d = \exp(\Omega(d \log(\beta d)/\varepsilon))$ . Let us identify the points in  $S$  with indices in  $[|S|]$ . For a binary string  $b \in \{0, 1\}^{|S|}$ , define the function  $f_b$  by

$$f_b(x) = \begin{cases} \beta \|x - s\|_2 & \text{if } \|x - s\|_2 < \varepsilon/\beta \text{ for } s \text{ with } b_s = 1, \\ \varepsilon & \text{otherwise.} \end{cases}$$

Since the distance between points in  $S$  is at least  $2\varepsilon/\beta$ , the functions  $f_T$  are well-defined, continuous and  $\beta$ -Lipschitz.

**Theorem 12.** *Given parameters  $N, d, \varepsilon$  and  $\beta$  satisfying  $d\beta/\varepsilon = \Omega(1)$  and  $(\beta d^{1/2}/2C\varepsilon)^d = \omega(\log N)$ , any protocol solving  $I$  with error probability  $\delta > 0$  when the inputs are guaranteed to be functions  $f_b$  for  $b \in \{0, 1\}^{|S|}$  has communication complexity  $N \exp(\Omega(d \log(\beta d)/\varepsilon))$ .*

*Proof.* Assume there is a protocol  $\Pi$  with the properties stated in the claim, and worst-case communication cost  $C_\Pi$ . We now show that we can use  $\Pi$  to solve set disjointness over universe of size  $|S|$  with  $C_\Pi$  total communication, which implies

$$C_\Pi \geq \text{RCC}^\delta(\text{DISJ}_{|S|,N}) = \Omega(N \exp(\Omega(d \log(\beta d)/\varepsilon))),$$

yielding the claim.

First, we note that after running  $\Pi$ , the coordinator can send the final estimate  $z$  of the optimum to all nodes, and receive approximations of the local function values  $f_i(z)$  from all nodes with additive  $O(Nd \log d\beta/\varepsilon)$  overhead, e.g. using quantisation of Corollary 9. We can without loss of generality assume that this does not exceed the total communication cost of  $\Pi$ .

For  $b_1, b_2, \dots, b_N \in \{0, 1\}^{|S|}$  that all contain 1 in some position  $s$ , then we have  $\sum_{i=1}^N f_{b_i}(x) = 0$ . Otherwise, for any point  $x \in [0, 1]^d$ , consider the closest point  $s \in S$  to  $x$ ; there is at least one  $b_i$  with  $b_s = 0$ , and for that function  $f_{b_i}(x) = \varepsilon$  by definition. Thus, if  $b_1, b_2, \dots, b_N$  are a YES-instance for set disjointness, then  $\inf_{x \in [0, 1]^d} \sum_{i=1}^N f_{b_i}(x) \geq \varepsilon$ , and if  $b_1, b_2, \dots, b_N$  are a NO-instance, then  $\inf_{x \in [0, 1]^d} \sum_{i=1}^N f_{b_i}(x) = 0$ .

By definition,  $\Pi$  can be used to distinguish between the two cases, and thus to solve set disjointness.  $\square$

## C Communication-optimal quantised gradient descent, full version

We now describe in detail our deterministic upper bound. Our algorithm uses quantised gradient descent, loosely following the outline of Magnússon et al. [25]. However, there are two crucial differences. First, we use a carefully-calibrated instance of the quantisation scheme of Davies et al. [11] to remove a  $\log d$  factor from the communication cost, and second, we use two-step quantisation to avoid all-to-all communication.

**Preliminaries on gradient descent.** We will assume that the input functions  $f_i: [0, 1]^d \rightarrow \mathbb{R}$  are  $\alpha_0$ -strongly convex and  $\beta_0$ -strongly smooth. This implies that  $F = \sum_{i=1}^N f_i$  is  $\alpha$ -strongly convex and  $\beta$ -strongly smooth for  $\alpha = N\alpha_0$  and  $\beta = N\beta_0$ . Consequently, the functions  $f_i$  and  $F$  have condition number bounded by  $\kappa = \beta/\alpha$ .

*Gradient descent* optimises the sum  $\sum_{i=1}^N f_i(x)$  by starting from an arbitrary point  $x^{(0)} \in [0, 1]^d$ , and applying the update rule

$$x^{(t+1)} = x^{(t)} - \gamma \sum_{i=1}^N \nabla f_i(x^{(t)}),$$

where  $\gamma > 0$  is a parameter.

Let  $x^*$  denote the global minimum of  $F$ . We use the following standard result on the convergence of gradient descent; see e.g. Bubeck [8].

**Theorem 13.** *For  $\gamma = 2/(\alpha + \beta)$ , we have that  $\|x^{(t+1)} - x^*\|_2 \leq \frac{\kappa-1}{\kappa+1} \|x^{(t)} - x^*\|_2$ .*

**Preliminaries on quantisation.** For compressing the gradients the nodes will send to coordinator, we use the recent quantisation scheme of Davies et al. [11]. Whereas the original uses randomised selection of the quantisation point to obtain a unbiased estimator, we can use a deterministic version that picks an arbitrary feasible quantisation point (e.g. the closest one). This gives the following guarantees:

**Corollary 14** ([11]). *Let  $R$  and  $\varepsilon$  be fixed positive parameters, and  $q \in \mathbb{R}^d$  be an estimate vector, and  $B \in \mathbb{N}$  be the number of bits used by the quantisation scheme. Then, there exists a deterministic quantisation scheme, specified by a function  $Q_{\varepsilon,R}: \mathbb{R}^d \times \mathbb{R}^d \rightarrow \mathbb{R}^d$ , an encoding function*

$\text{enc}_{\varepsilon,R}: \mathbb{R}^d \rightarrow \{0,1\}^B$ , and a decoding function  $\text{dec}_{\varepsilon,R}: \mathbb{R}^d \times \{0,1\}^B \rightarrow \mathbb{R}^d$ , with the following properties:

- (1) (Validity.)  $\text{dec}_{\varepsilon,R}(q, \text{enc}_{\varepsilon,R}(x)) = Q_{\varepsilon,R}(x, q)$  for all  $x, q \in \mathbb{R}^d$  with  $\|x - q\|_2 \leq R$ .
- (2) (Accuracy.)  $\|Q_{\varepsilon,R}(x, q) - x\|_2 \leq \varepsilon$  for all  $x, q \in \mathbb{R}^d$  with  $\|x - q\|_2 \leq R$ .
- (3) (Cost.) If  $\varepsilon = \lambda R$  for any  $\lambda < 1$ , the bit cost of the scheme satisfies  $B = O(d \log \lambda^{-1})$ .

### C.1 Algorithm description

We now describe the algorithm, and overview its guarantees. We assume that the constants  $\alpha$  and  $\beta$  are known to all nodes, so the parameters of the quantised gradient descent can be computed locally, and use  $W$  to be an upper bound on the diameter on the convex domain  $\mathbb{D}$ , e.g.  $W = d^{1/2}$  if  $\mathbb{D} = [0, 1]^d$ . We assume that the initial iterate  $x^{(0)}$  is arbitrary, but the same at all nodes, and set the initial quantisation estimate  $q_i^{(0)}$  at each  $i$  as the origin.

We define the following parameters for the algorithm. Let  $\gamma = 2/(\alpha + \beta)$  and  $\xi = \frac{\kappa-1}{\kappa+1}$  be the step size and convergence rate of gradient descent, and let  $W$  be such that  $\|x^{(0)} - x^*\| \leq W$ . We define

$$\mu = 1 - \frac{1}{\kappa + 1}, \quad \delta = \xi(1 - \xi)/4, \quad R^{(t)} = \frac{2\beta}{\xi} \mu^t W,$$

where  $\mu$  will be the convergence rate of our quantised gradient descent, and  $\delta$  and  $R^{(t)}$  will be parameters controlling the quantisation at each step. For the purposes of analysis, we assume that  $\kappa \geq 2$ . Note that this implies that  $1/3 \leq \xi < 1$ ,  $\mu < 1$ , and  $0 < \delta < 1$ .

The algorithm proceeds in rounds  $t = 1, 2, \dots, T$ . At the beginning of round  $t + 1$ , each node  $i$  knows the values of the iterate  $x^{(t)}$ , the global quantisation estimate  $q^{(t)}$ , and its local quantisation estimate  $q_i^{(t)}$  for  $i = 1, 2, \dots, N$ . At step  $t$ , nodes perform the following steps:

- (1) Each node  $i$  updates its iterate as  $x^{(t+1)} = x^{(t)} - \gamma q^{(t)}$ .
- (2) Each node  $i$  computes its local gradient over  $x^{(t+1)}$ , and transmits it in quantised form to the coordinator as follows. Let  $\varepsilon_1 = \delta R^{(t+1)}/2N$  and  $\rho_1 = R^{(t+1)}/N$ .
  - (a) Node  $i$  computes  $\nabla f_i(x^{(t+1)})$  locally, and sends message  $m_i = \text{enc}_{\varepsilon_1, \rho_1}(\nabla f_i(x^{(t+1)}))$  to the coordinator.
  - (b) The coordinator receives messages  $m_i$  for  $i = 1, 2, \dots, N$ , and decodes them as  $q_i^{(t+1)} = \text{dec}_{\varepsilon_1, \rho_1}(q_i^{(t)}, m_i)$ . The coordinator then computes  $r^{(t+1)} = \sum_{i=1}^N q_i^{(t+1)}$ .
- (3) The coordinator sends the quantised sum of gradients to all other nodes as follows. Let  $\varepsilon_2 = \delta R^{(t+1)}/2$  and  $\rho_2 = 2R^{(t+1)}$ .
  - (a) The coordinator sends the message  $m = \text{enc}_{\varepsilon_2, \rho_2}(r^{(t+1)})$  to each node  $i$ .
  - (b) Each node decodes the coordinator's message as  $q^{(t+1)} = \text{dec}_{\varepsilon_2, \rho_2}(q^{(t)}, m)$ .

After round  $T$ , all nodes know the final iterate  $x^{(T)}$ .

### C.2 Analysis

For simplicity, we will split the analysis into two parts. The first describes and analyses the algorithm in an abstract way; the second part describes the details of implementing it in the coordinator model. For technical convenience, assume  $\kappa \geq 2$ ; for smaller condition numbers, we can run the algorithm with  $\kappa = 2$ .

**Convergence.** Let  $\gamma = 2/(\alpha + \beta)$ , let  $x^{(0)} \in [0, 1]^d$ ,  $q_i^{(0)} \in \mathbb{R}^d$  and  $q_i^{(0)} \in \mathbb{R}^d$  for  $i = 1, 2, \dots, N$  be arbitrary initial values. From the algorithm description, we see that the update rule for our quantised gradient descent is

$$\begin{aligned} x^{(t+1)} &= x^{(t)} - \gamma q^{(t)}, \\ q_i^{(t+1)} &= Q_{\varepsilon_1, \rho_1}(\nabla f_i(x^{(t+1)}), q_i^{(t)}) \quad \text{for } \varepsilon_1 = \delta R^{(t+1)}/2N \text{ and } \rho_1 = R^{(t+1)}/N, \end{aligned}$$

$$r^{(t+1)} = \sum_{i=1}^N q_i^{(t+1)},$$

$$q^{(t+1)} = Q_{\varepsilon_2, \rho_2}(r^{(t+1)}, q^{(t)}) \quad \text{for } \varepsilon_2 = \delta R^{(t+1)}/2 \text{ and } \rho_2 = 2R^{(t+1)}.$$

**Lemma 15.** *The inequalities*

$$\|x^{(t)} - x^*\|_2 \leq \mu^t W, \quad (\text{Q1})$$

$$\|\nabla f_i(x^{(t)}) - q_i^{(t)}\|_2 \leq \delta R^{(t)}/2N, \quad (\text{Q2})$$

$$\|\nabla F(x^{(t)}) - q^{(t)}\|_2 \leq \delta R^{(t)} \quad (\text{Q3})$$

hold for all  $t$ , assuming that they hold for  $x^{(0)}$ ,  $q^{(0)}$  and  $q_i^{(0)}$  for  $i = 1, 2, \dots, N$ .

*Proof.* We apply induction over  $t$ ; we assume that the inequalities (Q1-Q3) hold for  $t$ , and prove that they also hold for  $t + 1$ . Since we assume the inequalities hold for  $t = 0$ , the base case is trivial. By elementary computation, the following hold:

$$0 < \xi < 1, \quad 0 < \delta < 1, \quad 2\delta/\xi + \xi = \mu, \quad \gamma\beta \leq 2, \quad \mu R^{(t)} = R^{(t+1)}.$$

*Convergence (Q1):* First, we observe that  $\frac{2\delta}{\xi} + \xi = \frac{1}{2}(1 + \xi) = 1 - \frac{1}{\kappa+1} = \mu$  and  $\gamma\beta \leq 2$ . We now have that

$$\begin{aligned} \|x^{(t+1)} - x^*\|_2 &= \|x^{(t)} - \gamma q^{(t)} + \gamma \nabla F(x^{(t)}) - \gamma \nabla F(x^{(t)}) + x^*\|_2 && (\text{def.}) \\ &\leq \|\gamma q^{(t)} - \gamma \nabla F(x^{(t)})\|_2 + \|(x^{(t)} - \gamma \nabla F(x^{(t)})) - x^*\|_2 && (\text{triangle-i.e.}) \\ &\leq \gamma \|\nabla F(x^{(t)}) - q^{(t)}\|_2 + \xi \|x^{(t)} - x^*\|_2 && (\text{norm, Thm. 13}) \\ &\leq \gamma \delta R^{(t)} + \xi \mu^t W && (\text{by Q1, Q3 for } t) \\ &= (\gamma\beta\delta/\xi + \xi) \mu^t W && (\text{expand } R^{(t)}) \\ &\leq (2\delta/\xi + \xi) \mu^t W = \mu^{t+1} W. && (\gamma\beta \leq 2) \end{aligned}$$

*Local quantisation (Q2):* First, let us observe that to prove that (Q2) holds for  $t + 1$ , it is sufficient to show  $\|\nabla f_i(x^{(t+1)}) - q_i^{(t)}\|_2 \leq R^{(t+1)}/N$ , as the claim then follows from the definition of  $q_i^{(t+1)}$  and Corollary 9. We have

$$\begin{aligned} \|\nabla f_i(x^{(t+1)}) - q_i^{(t)}\|_2 &= \|\nabla f_i(x^{(t+1)}) - \nabla f_i(x^{(t)}) + \nabla f_i(x^{(t)}) - q_i^{(t)}\|_2 \\ &\leq \|\nabla f_i(x^{(t+1)}) - \nabla f_i(x^{(t)})\|_2 + \|\nabla f_i(x^{(t)}) - q_i^{(t)}\|_2 && (\text{triangle-i.e.}) \\ &\leq \beta_0 \|x^{(t+1)} - x^{(t)}\|_2 + \delta R^{(t)}/N && (\text{smoothness, Q3}) \\ &\leq \beta_0 (\|x^{(t+1)} - x^*\|_2 + \|x^{(t)} - x^*\|_2) + \delta R^{(t)}/N && (\text{triangle-i.e.}) \\ &\leq 2\beta_0 \mu^t W + \delta R^{(t)}/N && (\text{by Q1 for } t, t+1) \\ &= 2\beta \mu^t W/N + \delta R^{(t)}/N && (\beta = \beta_0 N) \\ &= \xi R^{(t)}/N + \delta R^{(t)}/N && (\text{definition of } R^{(t)}) \\ &= (\xi + \delta) R^{(t)}/N && (\text{rearrange}) \\ &\leq (\xi + 2\delta/\xi) R^{(t)}/N && (2/\xi \geq 1) \\ &= \mu R^{(t)}/N = R^{(t+1)}/N. && (2\delta/\xi + \xi = \mu) \end{aligned}$$

*Global quantisation (Q3):* To prove (Q3), we start by giving two auxiliary inequalities. First, we prove that  $\|\nabla F(x^{(t+1)}) - r^{(t+1)}\|_2 \leq \delta R^{(t+1)}/2$ :

$$\begin{aligned} \|\nabla F(x^{(t+1)}) - r^{(t+1)}\|_2 &= \left\| \sum_{i=1}^N \nabla f_i(x^{(t+1)}) - \sum_{i=1}^N q_i^{(t+1)} \right\|_2 && (\text{def.}) \\ &\leq \sum_{i=1}^N \|\nabla f_i(x^{(t+1)}) - q_i^{(t+1)}\|_2 && (\text{triangle-i.e.}) \end{aligned}$$

$$\leq N\delta R^{(t+1)}/2N = \delta R^{(t+1)}/2. \quad (\text{by Q2 for } t+1)$$

Next, we want to prove  $\|r^{(t+1)} - q^{(t+1)}\|_2 \leq \delta R^{(t+1)}/2$ . Again, it is sufficient to show  $\|r^{(t+1)} - q^{(t)}\|_2 \leq 2R^{(t+1)}$ , as the claim then follows from the definition of  $q^{(t+1)}$  and Corollary 9. We have

$$\begin{aligned} \|r^{(t+1)} - q^{(t)}\|_2 &= \|r^{(t+1)} + \nabla F(x^{(t+1)}) - \nabla F(x^{(t+1)}) + \nabla F(x^{(t)}) - \nabla F(x^{(t)}) - q^{(t)}\|_2 \\ &\leq \|r^{(t+1)} - \nabla F(x^{(t+1)})\|_2 + \|\nabla F(x^{(t+1)}) - \nabla F(x^{(t)})\|_2 + \|\nabla F(x^{(t)}) - q^{(t)}\|_2 \\ &\leq \delta R^{(t+1)}/2 + \beta\|x^{(t+1)} - x^{(t)}\|_2 + \delta R^{(t)}, \end{aligned}$$

where the last inequality follows from smoothness of  $F$ , equation (Q2) for  $t+1$  and equation (Q3) for  $t$ . It holds that

$$\begin{aligned} \beta\|x^{(t+1)} - x^{(t)}\|_2 + \delta R^{(t)} &\leq \beta(\|x^{(t+1)} - x^*\|_2 + \|x^{(t)} - x^*\|_2) + \delta R^{(t)} && (\text{triangle-i.e.}) \\ &\leq 2\beta\mu^t W + \delta R^{(t)} && (\text{by Q1 for } t, t+1) \\ &= \xi R^{(t)} + \delta R^{(t)} && (\text{definition of } R^{(t)}) \\ &\leq (\xi + 2\delta/\xi)R^{(t)} && (2/\xi \geq 1) \\ &= \mu R^{(t)} = R^{(t+1)}. \end{aligned}$$

Combining the two previous inequalities, we have

$$\|r^{(t+1)} - q^{(t)}\|_2 \leq \delta R^{(t+1)}/2 + R^{(t+1)} \leq 2R^{(t+1)},$$

as desired.

Finally, putting things together, we have

$$\begin{aligned} \|\nabla F(x^{(t+1)}) - q^{(t+1)}\|_2 &= \|\nabla F(x^{(t+1)}) - r^{(t+1)} + r^{(t+1)} - q^{(t+1)}\|_2 \\ &\leq \|\nabla F(x^{(t+1)}) - r^{(t+1)}\|_2 + \|r^{(t+1)} - q^{(t+1)}\|_2 \\ &\leq \delta R^{(t+1)}/2 + \delta R^{(t+1)}/2 = \delta R^{(t+1)}, \end{aligned}$$

completing the proof.  $\square$

**Lemma 16.** For any  $\varepsilon > 0$  and  $t \geq (\kappa + 1) \log \frac{W}{\varepsilon}$ , we have  $\|x^{(t)} - x^*\|_2 \leq \varepsilon$ .

*Proof.* By Lemma 15, we have  $\|x^{(t)} - x^*\|_2 \leq \mu^t W = (1 - (1 - \mu))^t W \leq e^{-(1-\mu)t} W$ . Assuming  $t \geq \frac{1}{1-\mu} \log \frac{W}{\varepsilon}$ , we have

$$e^{-(1-\mu)t} W \leq e^{-(1-\mu)(1-\mu)^{-1} \log W/\varepsilon} W = e^{\log \varepsilon/W} W = \varepsilon W/W = \varepsilon.$$

The claim follows by observing that  $\frac{1}{1-\mu} = \kappa + 1$  by definition.  $\square$

**Communication cost.** Finally, we analyse the distributed implementation described at the beginning of this section, and analyse its total communication cost. Recall that we assume that the parameters  $\alpha$  and  $\beta$  are known to all nodes, so the parameters of the quantised gradient descent can be computed locally, and use  $W = d^{1/2}$ . Note that  $W$  is the only parameter depending on the input domain, so the algorithm also applies for arbitrary convex domain  $\mathbb{D} \subseteq \mathbb{R}^d$ , setting  $W$  to be the diameter of  $\mathbb{D}$ .

Since  $\delta < 1$ , we have by Lemma 9 that the each of the messages sent by the nodes has length at most  $O(d \log \delta^{-1})$  bits. Assuming  $\kappa \geq 2$ , we have  $\xi \geq 1/3$  and

$$\log \delta^{-1} = \log \frac{2(\kappa + 1)}{\xi} \leq \log 6(\kappa + 1) \leq \log 7\kappa.$$

Since the nodes send a total of  $2N$  messages of  $O(d \log \kappa)$  bits each, the total communication cost of a single round is  $O(Nd \log \kappa)$  bits.

To get  $F(x^{(T)}) - F(x^*) \leq \varepsilon$ , we need  $\|x^{(T)} - x^*\|_2 \leq (\varepsilon/\beta)^2$ . By Lemma 16, selecting  $T = O(\kappa \log \frac{\beta W}{\varepsilon})$  is sufficient. Finally, using  $W = O(d^{1/2})$ , we have that the total communication cost of the optimisation is  $O(Nd\kappa \log \kappa \log \frac{\beta d}{\varepsilon})$ .

## D Subsampling

In this section, we show that the condition  $\beta d/N^2\varepsilon = \Omega(1)$  in our main lower bound is, to a degree, necessary.

**Lemma 17.** *Let  $S = \{x_1, x_2, \dots, x_N\} \subseteq [0, 1]^d$ , and let  $X_1, X_2, \dots, X_M$  be i.i.d. random variables, each selected uniformly at random from  $S$ . Writing  $\hat{x} = \frac{1}{N} \sum_{i=1}^N x_i$  and  $X = \frac{1}{M} \sum_{i=1}^M X_i$ , we have*

$$\mathbb{E}[\|X - \hat{x}\|_2] = 0, \quad \text{and} \quad \text{Var}(\|X - \hat{x}\|_2) = \frac{d}{M}.$$

*Proof.* The first part follows immediately by the definition of the expectation. For the second part, we first note that since all points within  $[0, 1]^d$  are at most  $d^{1/2}$  apart, and thus by the definition of variance, it follows that

$$\begin{aligned} \text{Var}(\|X - \hat{x}\|_2) &= \mathbb{E}[\|X - \hat{x}\|_2^2] - \mathbb{E}[\|X - \hat{x}\|_2]^2 = \mathbb{E}[\|X - \hat{x}\|_2^2] - 0 \\ &\leq \mathbb{E}\left[\frac{1}{M^2} \sum_{i=1}^M \|X_i - \hat{x}\|_2^2\right] = \frac{1}{M^2} \sum_{i=1}^M \mathbb{E}[\|X_i - \hat{x}\|_2^2] \\ &\leq \frac{1}{M^2} M d = \frac{d}{M}. \end{aligned}$$

□

**Theorem 18.** *Assume the input functions  $f_i$  of the nodes are promised to be quadratic functions  $x \mapsto \beta_0 \|x - x^*\|_2^2$  for some constant  $\beta_0 > 0$ , let  $\beta = \beta_0 N$ , and assume we can select  $M \leq N$  to be an integer satisfying  $\beta d/M\varepsilon \leq 1/8$ . Then there is a randomised algorithm solving (1) using*

$$O\left(Md \log \frac{\beta d}{\varepsilon}\right) \text{ bits of communication,}$$

*with probability at least 1/2.*

*Proof.* We start by having the coordinator select a multiset  $I$  of  $M$  nodes uniformly at random with replacement. Let  $\hat{x}$  denote the global optimum of  $\sum_{i=1}^N f_i$ , and let  $\hat{Y}$  be the random variable for the global optimum of  $\sum_{i \in I} f_i$ . By Lemma 17, Chebyshev's inequality and the assumption  $\beta d/N\varepsilon \leq 1/8$ , we have that

$$\Pr\left[\|\hat{Y} - \hat{x}\|_2 \geq \frac{1}{2} \left(\frac{\varepsilon}{\beta}\right)^{1/2}\right] \leq \frac{4d\beta}{\varepsilon M} \leq 1/2.$$

Let  $\hat{y}$  be the actualised value of  $\hat{Y}$ . We now apply the algorithm of Theorem 10 to find a point  $z$  such that  $\|z - \hat{y}\|_2 \leq 1/2(\varepsilon/\beta)^{1/2}$ , where, if the multiset  $I$  contains duplicates, those nodes simulate multiple copies of themselves. This uses  $O(Md \log \beta d/\varepsilon)$  bits of communication. We now have with probability at least 1/2 that  $\|z - \hat{x}\|_2 \leq (\varepsilon/\beta)^{1/2}$ , and thus  $\sum_{i=1}^N f_i(z) \leq \sum_{i=1}^N f_i(\hat{x}) + \varepsilon$ . □

## Checklist

- (1) For all authors...
  - (1) Do the main claims made in the abstract and introduction accurately reflect the paper's contributions and scope? [Yes]
  - (2) Did you describe the limitations of your work? [Yes]
  - (3) Did you discuss any potential negative societal impacts of your work? [Yes]
  - (4) Have you read the ethics review guidelines and ensured that your paper conforms to them? [Yes]
- (2) If you are including theoretical results...
  - (1) Did you state the full set of assumptions of all theoretical results? [Yes]
  - (2) Did you include complete proofs of all theoretical results? [Yes]
- (3) If you ran experiments...
  - (1) Did you include the code, data, and instructions needed to reproduce the main experimental results (either in the supplemental material or as a URL)? [N/A]
  - (2) Did you specify all the training details (e.g., data splits, hyperparameters, how they were chosen)? [N/A]
  - (3) Did you report error bars (e.g., with respect to the random seed after running experiments multiple times)? [N/A]
  - (4) Did you include the total amount of compute and the type of resources used (e.g., type of GPUs, internal cluster, or cloud provider)? [N/A]
- (4) If you are using existing assets (e.g., code, data, models) or curating/releasing new assets...
  - (1) If your work uses existing assets, did you cite the creators? [N/A]
  - (2) Did you mention the license of the assets? [N/A]
  - (3) Did you include any new assets either in the supplemental material or as a URL? [N/A]
  - (4) Did you discuss whether and how consent was obtained from people whose data you're using/curating? [N/A]
  - (5) Did you discuss whether the data you are using/curating contains personally identifiable information or offensive content? [N/A]
- (5) If you used crowdsourcing or conducted research with human subjects...
  - (1) Did you include the full text of instructions given to participants and screenshots, if applicable? [N/A]
  - (2) Did you describe any potential participant risks, with links to Institutional Review Board (IRB) approvals, if applicable? [N/A]
  - (3) Did you include the estimated hourly wage paid to participants and the total amount spent on participant compensation? [N/A]
